# Supplementary material for: Identification of RNA structures and their roles in RNA functions
Source: Springer Nature journal article supplement (doi:10.1038/s41580-024-00748-6), 2024-06-26
Supplement: 41580_2024_748_MOESM1_ESM.pdf [file 41580_2024_748_MOESM1_ESM.pdf]

Supplementary information

---

# Identification of RNA structures and their roles in RNA functions

---

In the format provided by  
the authors and unedited

Supplementary Table 1. **Methods for studying RNA structures *in vivo***

| Chemical probing    |                    |                    |                                     |             |                                                                                   |                                                                 |
|---------------------|--------------------|--------------------|-------------------------------------|-------------|-----------------------------------------------------------------------------------|-----------------------------------------------------------------|
| Sequencing Platform | Structure read-out | Method             | Key References                      | Probe       | Target RNA structure scope                                                        | Biological sample type                                          |
| Short read          | RT-stalling        | SHAPE-seq          | 1                                   | 1M7         | Single target                                                                     | <i>In vitro</i> treatment                                       |
|                     |                    |                    | In cell SHAPE-seq <sup>2</sup>      | 1M7         | Single target (overexpressed/endogenous)                                          | <i>E. coli</i>                                                  |
|                     |                    | DMS-seq            | 3                                   | DMS         | polyA <sup>+</sup> transcriptome                                                  | Yeast, cultured human cells (K562, human foreskin fibroblasts)  |
|                     |                    | Structure-seq      | 4                                   | DMS         | polyA <sup>+</sup> transcriptome                                                  | Arabidopsis seedlings                                           |
|                     |                    |                    | Targeted Structure-seq <sup>5</sup> | DMS         | Single target                                                                     | Cultured mouse cells (clonal female MEFs)                       |
|                     |                    |                    | Structure-seq2 (Ref. <sup>6</sup> ) | DMS         | polyA <sup>+</sup> transcriptome                                                  | Rice shoots                                                     |
|                     |                    |                    | CAP-STRUCTURE-seq <sup>7</sup>      | NAI         | polyA <sup>+</sup> transcriptome with intact 5' cap                               | Arabidopsis seedlings                                           |
|                     |                    | MOD-seq            | 8                                   | DMS         | rRNA                                                                              | Yeast                                                           |
|                     |                    | icSHAPE            | 9                                   | NAI-N3      | polyA <sup>+</sup> transcriptome                                                  | Cultured mouse cells (mES)                                      |
|                     |                    |                    | 10                                  | NAI-N3      | rRNA <sup>-</sup> transcriptome from cytoplasmic, nuclear and chromatin fractions | Cultured human (HEK293) and mouse cells (mES)                   |
|                     |                    | SPET-seq           | 11                                  | DMS         | Nascent transcriptome                                                             | <i>E. coli</i>                                                  |
|                     |                    | Keth-seq           | 12                                  | N3-Kethoxal | rRNA; polyA <sup>+</sup> transcriptome                                            | Cultured human (HeLa) and mouse cells (mES)                     |
|                     |                    | LASER-seq          | 13                                  | NAz         | rRNA                                                                              | Cultured human cells (K562)                                     |
|                     |                    | icLASER            | 14                                  | NAz-N3      | polyA <sup>+</sup> transcriptome                                                  | Cultured human cells (HeLa, K562)                               |
|                     | RT-MaP             | SHAPE-MaP          | 15                                  | 1M7         | HIV genome                                                                        | <i>in vitro</i> treatment                                       |
|                     |                    |                    | 16                                  | 1M7         | Single target                                                                     | Cultured mouse cells (TSC)                                      |
|                     |                    |                    | 17                                  | 1M7         | rRNA <sup>-</sup> transcriptome                                                   | <i>E. coli</i>                                                  |
|                     |                    | DMS-MaPseq         | 18                                  | DMS         | rRNA <sup>-</sup> transcriptome, single targets                                   | Yeast, cultured human cells (HEK293T), <i>Drosophila</i> oocyte |
|                     |                    | DIM-2P-seq         | 19                                  | DMS         | 3' end of polyA <sup>+</sup> transcriptome                                        | Cultured human cells (HEK293T)                                  |
|                     |                    | icSHAPE-MaP        | 20                                  | NAI-N3      | DICER-target small RNAs                                                           | Cultured human cells (HEK293T)                                  |
|                     |                    | tRNA Structure-seq | 21                                  | DMS         | tRNAs                                                                             | <i>E. coli</i>                                                  |

|                             |                               |                 |                                                           |                                   |                                                                                          |                                                                                    |
|-----------------------------|-------------------------------|-----------------|-----------------------------------------------------------|-----------------------------------|------------------------------------------------------------------------------------------|------------------------------------------------------------------------------------|
|                             |                               | LASER-MaP       | 13                                                        | NAz                               | rRNA                                                                                     | Cultured human cells (K562)                                                        |
|                             | Lead score                    | Lead-seq        | 22                                                        | Lead(II) ions                     | rRNA <sup>-</sup> transcriptome                                                          | <i>Yersinia pseudotuberculosis</i>                                                 |
| Long-read                   | Direct modification detection | PORE-cupine     | 23                                                        | NAI-N3                            | polyA <sup>+</sup> transcriptome                                                         | Cultured human cells (H9)                                                          |
|                             |                               | nanoSHAPE       | 24                                                        | Aclm                              | pri-miRNA                                                                                | In vitro                                                                           |
|                             |                               | SMS-seq         | 25                                                        | DEPC                              | polyA <sup>+</sup> and polyA <sup>-</sup> transcriptome                                  | Yeast (in vitro probed)                                                            |
|                             | RT-MaP                        | smStructure-seq | 26                                                        | NAI                               | Single target                                                                            | <i>Arabidopsis thaliana</i> seedlings                                              |
|                             |                               | Nano-DMS-MaP    | 27                                                        | DMS                               | HIV genome and transcriptome                                                             | Cultured human cells (HEK293T); HIV                                                |
| <b>RNA–RNA interactions</b> |                               |                 |                                                           |                                   |                                                                                          |                                                                                    |
| <b>Structure read-out</b>   |                               | <b>Method</b>   | <b>Key references</b>                                     | <b>Crosslinker</b>                | <b>Target RNA structure scope</b>                                                        | <b>Biological sample type</b>                                                      |
| All mapped reads            |                               | RAP-RNA         | 28                                                        | AMT, formaldehyde, DSG            | Direct RNA–RNA base-pairing and indirect RNA–RNA interactions of certain RNA of interest | Cultured mouse cells (V6.5 and pSM33 male mouse ES cells)                          |
| Chimera reads               |                               | PARIS           | 29                                                        | AMT                               | Transcriptome-wide direct RNA–RNA base-pairing                                           | Cultured human (HeLa, HEK293T) and mouse (mES) cells                               |
|                             |                               | SPLASH          | 30                                                        | Biotinylated psoralen             | Transcriptome-wide direct RNA–RNA base-pairing                                           | <i>E. coli</i> , yeast, cultured human cells (HeLa, GM12892, H1)                   |
|                             |                               | LIGR-seq        | 31                                                        | AMT                               | Transcriptome-wide direct RNA–RNA base-pairing                                           | Cultured human cells (HEK293T)                                                     |
|                             |                               | COMRADES        | 32                                                        | Azide-modified psoralen           | Transcriptome-wide direct RNA–RNA base-pairing                                           | Cultured human cells (JEG-3) infected with Zika virus                              |
|                             |                               | CLASH           | 33                                                        | UV                                | Spatial proximity mediated by single protein of interest                                 | Yeast overexpressing target protein of interest                                    |
|                             |                               | hiCLIP          | 34                                                        | UV                                | Spatial proximity mediated by single protein of interest                                 | Cultured human cells (Fip-In 293 T-REx ) overexpressing target protein of interest |
|                             |                               | CRIC-seq        | 35                                                        | Formaldehyde                      | Spatial proximity mediated by single protein of interest                                 | Cultured human cells (HeLa)                                                        |
|                             |                               | RIPPLiT         | 36                                                        | No crosslinking                   | Spatial proximity mediated by single protein of interest                                 | Cultured human cells (HEK293) overexpressing target protein of interest            |
|                             |                               | RPL             | 37                                                        | No crosslinking                   | Transcriptome-wide spatial proximity mediated by stable base-pairing                     | Yeast and cultured human cells (GM12878)                                           |
|                             |                               | MARIO           | 38                                                        | Formaldehyde and ethyl glycol bis | Transcriptome-wide spatial proximity mediated by proteome                                | Mouse brain tissue, cultured mouse (E14 ES, MEF) and drosophila cells (S2)         |
| RIC-seq                     | 39                            | Formaldehyde    | Transcriptome-wide spatial proximity mediated by proteome | Cultured human cells (HeLa)       |                                                                                          |                                                                                    |

|  |          |               |                                                       |                                      |                                                                                    |
|--|----------|---------------|-------------------------------------------------------|--------------------------------------|------------------------------------------------------------------------------------|
|  | SHARC    | <sup>40</sup> | Dimeric 2'-OH acylating reagents of different lengths | Transcriptome-wide spatial proximity | Cultured human cells (HeLa, HEK293T)                                               |
|  | KARR-seq | <sup>41</sup> | N3-kethoxal and DBCO-modified dendrimers              | Transcriptome-wide spatial proximity | Cultured human (K562, HepG2, HEK293T, virus infected A549) and mouse (mESCs) cells |

**Full names for probing and crosslinking chemicals:**

1M7: 1-methyl-7-nitroisatoic anhydride

AcIm: 1-acetylimidazole

AMT: 4'-aminomethyltrioxsalen

DEPC: diethyl pyrocarbonate

DMS: dimethyl sulphate

DSG: disuccinimidyl glutarate

DBCO: dibenzocyclooctane

NAI: 2-methylnicotinic acid

NAI-N3: 2-(azidomethyl)nicotinic acid imidazole

NAz: nicotinoyl azide

**Full names for chemical probing methods:**

CAP-STRUCTURE-seq: 5'CAP-enriched and 3' poly(A)-enriched RNAstructure sequencing.

DIM-2P-seq: DMS-induced mutations mapped by poly(A)-primed sequencing

DMS-MaPseq: DMS mutational profiling with sequencing

DMS-seq: DMS probing with sequencing

icLASER: in vivo click selective Light Activated Structural Examination of RNA

icSHAPE: in vivo click selective 2'-hydroxyl acylation and profiling experiment

Keth-seq: N3-kethoxal probing followed by deep sequencing

LASER-MaP: light activated structural examination of RNA by mutational profiling

LASER-seq: light activated structural examination of RNA by highthroughput sequencing

Lead-seq: lead(II) ion-based structure probing with next-generation sequencing

MOD-seq: map RNA chemical modification using high-throughput sequencing

Nano-DMS-MaP: nanopore dimethylsulfate mutational profiling

nanoSHAPE: direct RNA nanopore sequencing of AcIm modified RNA

PORE-cupine: RNA structure analysis using nanopore sequencing

SHAPE-MaP: selective 2'-hydroxyl acylation analyzed by primer extension and mutational profiling

SHAPE-seq: selective 2'-hydroxyl acylation analyzed by primer extension sequencing

SMS-seq: single molecule structure sequencing

smStructure-seq: single-molecule-based RNA structure sequencing

SPET-seq: structural probing of elongating transcripts

**Full names for RNA-RNA interaction methods:**

CLASH: cross-linking, ligation, and sequencing of hybrids

COMRADES: cross-linking of matched RNAs and deep sequencing

CRIC-seq: capture RNA in situ conformation sequencing

hiCLIP: hybrid and individual-nucleotide resolution ultraviolet crosslinking and immunoprecipitation

KARR-seq: kethoxal-assisted RNA–RNA interaction sequencing

LIGR-seq: ligation of interacting RNA and high-throughput sequencing

MARIO: RNA interactome in vivo

PARIS: psoralen analysis of RNA interactions and structures

RAP-RNA: RNA antisense purification to identify intermolecular RNA-RNA interactions

RIC-seq: RNA in situ conformation sequencing

RIPPLIT: RNA immunoprecipitation and proximity ligation in tandem

RPL: RNA proximity ligation

SHARC: spatial 2'-hydroxyl acylation reversible crosslinking

SPLASH: sequencing of psoralen crosslinked, ligated, and selected hybrids

Supplementary Table 2. **Representative computational tools for RNA structure studies**

| Function                              | Name                                  | Primary algorithm                        | Highlights of the methods                                                                                     | Key references | Links                                                                                                                                           |
|---------------------------------------|---------------------------------------|------------------------------------------|---------------------------------------------------------------------------------------------------------------|----------------|-------------------------------------------------------------------------------------------------------------------------------------------------|
| Processing RNA structure-probing Data | The probabilistic model for SHAPE-seq | Maximum likelihood                       | Identify the true chemical-induced signals from high-throughput sequencing data.                              | 42             |                                                                                                                                                 |
|                                       | BUM-HMM                               | beta-uniform mixture hidden Markov model | Identify the true chemical-induced signals from high-throughput sequencing data with increased sensitivity.   | 43             | <a href="https://github.com/alineselega/BUMHMM">https://github.com/alineselega/BUMHMM</a>                                                       |
|                                       | dStruct                               | Wilcoxon signed-rank test, the           | Identify differentially structured regions between groups of samples based on RNA structurome profiling data. | 44             | <a href="https://bioconductor.org/packages/release/bioc/html/dStruct.html">https://bioconductor.org/packages/release/bioc/html/dStruct.html</a> |

|                                                                   |                  |                                                                             |                                                                                                                                                                                                                       |       |                                                                                                                               |
|-------------------------------------------------------------------|------------------|-----------------------------------------------------------------------------|-----------------------------------------------------------------------------------------------------------------------------------------------------------------------------------------------------------------------|-------|-------------------------------------------------------------------------------------------------------------------------------|
|                                                                   |                  | Benjamini-Hochberg procedure                                                |                                                                                                                                                                                                                       |       |                                                                                                                               |
|                                                                   | diffBum-HMM      | beta-uniform mixture hidden Markov model                                    | Detect RNA structural changes from different samples.                                                                                                                                                                 | 45    | <a href="https://github.com/marangiop/diff_BUM_HMM">https://github.com/marangiop/diff_BUM_HMM</a>                             |
|                                                                   | DiffScan         | Nonparametric Wilcoxon test                                                 | Identify structurally variable regions at nucleotide resolution for multiple structure probing platforms.                                                                                                             | 46    | <a href="https://github.com/yub18/DiffScan">https://github.com/yub18/DiffScan</a>                                             |
|                                                                   | StructrueImpute  | Multi-layer bidirectional long short-term memory (BiLSTM)                   | Recover missing signals from RNA structure probing data.                                                                                                                                                              | 47    | <a href="https://github.com/Tsinghua-gongjing/StructureImpute">https://github.com/Tsinghua-gongjing/StructureImpute</a>       |
| <b>RNA conformation deconvolution from structure-probing data</b> | RING-MaP         | Filtered correlation analysis                                               | Measure diverse through-space RNA interaction groups corresponding to both RNA secondary and tertiary structures.                                                                                                     | 48    | <a href="https://weekslab.com/software/">https://weekslab.com/software/</a>                                                   |
|                                                                   | DREEM            | Expectation maximization (EM) algorithm                                     | Dissect alternative RNA conformations assumed by the same RNA sequence based on the RNA structure probing data.                                                                                                       | 49    | <a href="https://github.com/jyesselm/dreem">https://github.com/jyesselm/dreem</a>                                             |
|                                                                   | DANCE-Map        | Maximum likelihood (ML) clustering, expectation maximization (EM) algorithm | Define per-nucleotide chemical reactivity, direct base-pairing interactions, tertiary interactions, and thermodynamic populations for each state in RNA structural ensembles based on the RNA structure probing data. | 50    | <a href="https://github.com/MustoeLab/DanceMapper">https://github.com/MustoeLab/DanceMapper</a>                               |
|                                                                   | DRACO            | a combination of spectral clustering and fuzzy clustering                   | Identify an optimal number of RNA conformations without the limitation of RNA length based on the RNA structure probing data.                                                                                         | 51    | <a href="https://github.com/google/draco">https://github.com/google/draco</a>                                                 |
|                                                                   | DaVinci          | Stochastic context-free grammar (SCFG)                                      | Identify RNA conformation of individual single RNA molecules.                                                                                                                                                         | 26    | <a href="https://github.com/DingLab-RNAstructure/smStructure-seq">https://github.com/DingLab-RNAstructure/smStructure-seq</a> |
| <b>Functional RNA structure</b>                                   | TEISER, pyTEISER | Context-free grammars, mutual information                                   | Determine the motifs that are significantly informative of genome-wide measurements of RNA functions.                                                                                                                 | 52,53 | <a href="https://github.com/goodarzilab/pyteiser">https://github.com/goodarzilab/pyteiser</a>                                 |

|                                                    |              |                                                                                                                       |                                                                                                                                                                 |    |                                                                                                               |
|----------------------------------------------------|--------------|-----------------------------------------------------------------------------------------------------------------------|-----------------------------------------------------------------------------------------------------------------------------------------------------------------|----|---------------------------------------------------------------------------------------------------------------|
| <b>motif prediction</b>                            | SHAPEwarp    | Mueen's algorithm for similarity search (MASS), dynamic time warping (DTW)                                            | Identify both unknown and known conserved RNA structure elements based on the RNA structure chemical probing data                                               | 54 | <a href="https://github.com/dincarnato/SHAPEwarp">https://github.com/dincarnato/SHAPEwarp</a>                 |
| <b>AI-based RNA secondary structure prediction</b> | SPOT-RNA     | Residual networks (ResNets)<br>Bidirectional long short-term memory (BiLSTM)<br>Fully connected neural network (FCNN) | Predict all base-pairs, regardless of if they are associated with tertiary interactions.                                                                        | 55 | <a href="https://github.com/jaswindersingh2/SPOT-RNA">https://github.com/jaswindersingh2/SPOT-RNA</a>         |
|                                                    | MXfold2      | Bidirectional long short-term memory (BiLSTM)<br>Convolutional neural network (CNN)                                   | Predict RNA secondary structure with thermodynamic integration.                                                                                                 | 56 | <a href="https://github.com/mxfold/mxfold2">https://github.com/mxfold/mxfold2</a>                             |
|                                                    | Ufold        | Fully convolutional neural network (FCN)                                                                              | Predict RNA secondary structure including pseudoknots. The performance is fast (~160 ms/sequence with up to ~1500bp).                                           | 57 | <a href="https://github.com/uci-cbcl/UFold">https://github.com/uci-cbcl/UFold</a>                             |
|                                                    | GCNfold      | Transformer                                                                                                           | Predict RNA secondary structure including the long-distance base pairing. The performance is fast (<0.1s).                                                      | 58 | <a href="https://github.com/EnbinYang/GCNfold">https://github.com/EnbinYang/GCNfold</a>                       |
| <b>AI-based RNA tertiary structure prediction</b>  | ARES         | Deep neural network (DNN)                                                                                             | Predict RNA tertiary structures with a small amount of learning data using many processing layers with each layer's outputs serving as the next layer's inputs. | 59 | <a href="https://github.com/wk989898/ARES-implementation">https://github.com/wk989898/ARES-implementation</a> |
|                                                    | trRosettaRNA | Transformer                                                                                                           | Predict RNA tertiary structures using 1D and 2D geometries prediction along with 3D structural energy minimization.                                             | 60 | <a href="https://yanglab.qd.sdu.edu.cn/trRosettaRNA/">https://yanglab.qd.sdu.edu.cn/trRosettaRNA/</a>         |

|                                                                |               |                                                                                     |                                                                                                                                                                                                                   |    |                                                                                               |
|----------------------------------------------------------------|---------------|-------------------------------------------------------------------------------------|-------------------------------------------------------------------------------------------------------------------------------------------------------------------------------------------------------------------|----|-----------------------------------------------------------------------------------------------|
|                                                                | DRfold        | Transformer                                                                         | Predict RNA tertiary structures using coarse-grained end-to-end learning or geometry-based structural optimization.                                                                                               | 61 | <a href="https://zhanggroup.org/DRfold">https://zhanggroup.org/DRfold</a>                     |
| <b>AI-based<br/>RNA-Protein<br/>interaction<br/>prediction</b> | iDeepS        | Convolutional neural network (CNN)<br>Bidirectional long short-term memory (BiLSTM) | Predict the RNA binding protein binding sites based on the RNA sequence and structure motifs.                                                                                                                     | 62 | <a href="https://github.com/xypan1232/iDeepS">https://github.com/xypan1232/iDeepS</a>         |
|                                                                | PrismNet      | Squeeze-excitation (SE) residual network                                            | Predict RNA-protein interactions affected by single-nucleotide variants based on the RNA structure chemical probing data.                                                                                         | 63 | <a href="https://github.com/kuixu/PrismNet">https://github.com/kuixu/PrismNet</a>             |
|                                                                | RoseTTAFoldNA | Transformer                                                                         | Predict structures of protein-nucleic acid complexes without homologs. The model was trained using the dataset in the RoseTTAFold along with all RNA, protein-RNA, and protein-DNA complexes in the PDB database. | 64 | <a href="https://github.com/uwipd/RoseTTAFold2NA">https://github.com/uwipd/RoseTTAFold2NA</a> |

ARES: atomic rotationally equivariant scorer

BUM-HMM: beta-uniform mixture hidden Markov model

DANCE-Map: deconvolution and annotation of ribonucleic conformational ensemble

DaVinci: determination of the variation of the RNA structure conformation through stochastic context-free grammar

diffBum-HMM: differential beta-uniform mixture hidden Markov model

DiffScan: differential analysis of structure probing data at nucleotide resolution

DRACO: deconvolution of RNA alternative conformations

DREEM: detection of RNA folding ensembles using expectation maximization

PrismNet: protein-RNA Interaction by structure-informed modeling using deep neural NETWORK

RING-MaP: RNA interaction groups by mutational profiling

TEISER, pyTEISER: pyTEISER: tool for eliciting informative structural elements in RNA; pyTEISER: pythonicTEISER

## References

- 1 Lucks, J. B. *et al.* Multiplexed RNA structure characterization with selective 2'-hydroxyl acylation analyzed by primer extension sequencing (SHAPE-Seq). *Proc Natl Acad Sci U S A* **108**, 11063-11068 (2011).



- 2 Watters, K. E., Abbott, T. R. & Lucks, J. B. Simultaneous characterization of cellular RNA structure and function with in-cell SHAPE-Seq. *Nucleic Acids Res* **44**, e12 (2016).
- 3 Rouskin, S., Zubradt, M., Washietl, S., Kellis, M. & Weissman, J. S. Genome-wide probing of RNA structure reveals active unfolding of mRNA structures in vivo. *Nature* **505**, 701-705 (2014).
- 4 Ding, Y. *et al.* In vivo genome-wide profiling of RNA secondary structure reveals novel regulatory features. *Nature* **505**, 696-700 (2014).
- 5 Fang, R., Moss, W. N., Rutenberg-Schoenberg, M. & Simon, M. D. Probing Xist RNA Structure in Cells Using Targeted Structure-Seq. *PLoS Genet* **11**, e1005668 (2015).
- 6 Ritchey, L. E. *et al.* Structure-seq2: sensitive and accurate genome-wide profiling of RNA structure in vivo. *Nucleic Acids Res* **45**, e135 (2017).
- 7 Yang, M. *et al.* Intact RNA structurome reveals mRNA structure-mediated regulation of miRNA cleavage in vivo. *Nucleic Acids Research* **48**, 8767-8781 (2020).
- 8 Talkish, J., May, G., Lin, Y., Woolford, J. L., Jr. & McManus, C. J. Mod-seq: high-throughput sequencing for chemical probing of RNA structure. *RNA* **20**, 713-720 (2014).
- 9 Spitale, R. C. *et al.* Structural imprints in vivo decode RNA regulatory mechanisms. *Nature* **519**, 486-490 (2015).
- 10 Sun, L. *et al.* RNA structure maps across mammalian cellular compartments. *Nature Structural & Molecular Biology* **26**, 322-330 (2019).
- 11 Incarnato, D. *et al.* In vivo probing of nascent RNA structures reveals principles of cotranscriptional folding. *Nucleic Acids Res* **45**, 9716-9725 (2017).
- 12 Weng, X. *et al.* Keth-seq for transcriptome-wide RNA structure mapping. *Nat Chem Biol* **16**, 489-492 (2020).
- 13 Zinshteyn, B. *et al.* Assaying RNA structure with LASER-Seq. *Nucleic Acids Res* **47**, 43-55 (2019).
- 14 Chan, D. *et al.* Diverse functional elements in RNA predicted transcriptome-wide by orthogonal RNA structure probing. *Nucleic Acids Res* **49**, 11868-11882 (2021).
- 15 Siegfried, N. A., Busan, S., Rice, G. M., Nelson, J. A. & Weeks, K. M. RNA motif discovery by SHAPE and mutational profiling (SHAPE-MaP). *Nat Methods* **11**, 959-965 (2014).
- 16 Smola, M. J. *et al.* SHAPE reveals transcript-wide interactions, complex structural domains, and protein interactions across the Xist lncRNA in living cells. *Proc Natl Acad Sci U S A* **113**, 10322-10327 (2016).
- 17 Mustoe, A. M. *et al.* Pervasive Regulatory Functions of mRNA Structure Revealed by High-Resolution SHAPE Probing. *Cell* **173**, 181-195.e118 (2018).
- 18 Zubradt, M. *et al.* DMS-MaPseq for genome-wide or targeted RNA structure probing in vivo. *Nat Methods* **14**, 75-82 (2017).
- 19 Wu, X. & Bartel, D. P. Widespread Influence of 3'-End Structures on Mammalian mRNA Processing and Stability. *Cell* **169**, 905-917.e911 (2017).
- 20 Luo, Q. J. *et al.* RNA structure probing reveals the structural basis of Dicer binding and cleavage. *Nat Commun* **12**, 3397 (2021).
- 21 Yamagami, R., Sieg, J. P., Assmann, S. M. & Bevilacqua, P. C. Genome-wide analysis of the in vivo tRNA structurome reveals RNA structural and modification dynamics under heat stress. *Proceedings of the National Academy of Sciences* **119**, e2201237119 (2022).
- 22 Twittenhoff, C. *et al.* Lead-seq: transcriptome-wide structure probing in vivo using lead(II) ions. *Nucleic Acids Res* **48**, e71 (2020).
- 23 Aw, J. G. A. *et al.* Determination of isoform-specific RNA structure with nanopore long reads. *Nature Biotechnology* **39**, 336-346 (2021).
- 24 Stephenson, W. *et al.* Direct detection of RNA modifications and structure using single-molecule nanopore sequencing. *Cell Genom* **2**(2022).
- 25 Bizuayehu, T. T. *et al.* Long-read single-molecule RNA structure sequencing using nanopore. *Nucleic Acids Res* **50**, e120 (2022).

- 26 Yang, M. *et al.* In vivo single-molecule analysis reveals COOLAIR RNA structural diversity. *Nature* **609**, 394-399 (2022).
- 27 Bohn, P., Gribling-Burrer, A. S., Ambi, U. B. & Smyth, R. P. Nano-DMS-MaP allows isoform-specific RNA structure determination. *Nat Methods* **20**, 849-859 (2023).
- 28 Engreitz, J. M. *et al.* RNA-RNA interactions enable specific targeting of noncoding RNAs to nascent Pre-mRNAs and chromatin sites. *Cell* **159**, 188-199 (2014).
- 29 Lu, Z. *et al.* RNA duplex map in living cells reveals higher-order transcriptome structure. *Cell* **165**, 1267-1279 (2016).
- 30 Aw, J. G. A. *et al.* In vivo mapping of eukaryotic RNA interactomes reveals principles of higher-order organization and regulation. *Molecular cell* **62**, 603-617 (2016).
- 31 Sharma, E., Sterne-Weiler, T., O'Hanlon, D. & Blencowe, B. J. Global mapping of human RNA-RNA interactions. *Molecular cell* **62**, 618-626 (2016).
- 32 Ziv, O. *et al.* COMRADES determines in vivo RNA structures and interactions. *Nature Methods* **15**, 785-788 (2018).
- 33 Kudla, G., Granneman, S., Hahn, D., Beggs, J. D. & Tollervey, D. Cross-linking, ligation, and sequencing of hybrids reveals RNA-RNA interactions in yeast. *Proc Natl Acad Sci U S A* **108**, 10010-10015 (2011).
- 34 Sugimoto, Y. *et al.* hiCLIP reveals the in vivo atlas of mRNA secondary structures recognized by Stauf1. *Nature* **519**, 491-494 (2015).
- 35 Ye, R. *et al.* Capture RIC-seq reveals positional rules of PTBP1-associated RNA loops in splicing regulation. *Mol Cell* **83**, 1311-1327 e1317 (2023).
- 36 Metkar, M. *et al.* Higher-Order Organization Principles of Pre-translational mRNPs. *Mol Cell* **72**, 715-726 e713 (2018).
- 37 Ramani, V., Qiu, R. & Shendure, J. High-throughput determination of RNA structure by proximity ligation. *Nat Biotechnol* **33**, 980-984 (2015).
- 38 Nguyen, T. C. *et al.* Mapping RNA-RNA interactome and RNA structure in vivo by MARIO. *Nat Commun* **7**, 12023 (2016).
- 39 Cao, C. *et al.* Global in situ profiling of RNA-RNA spatial interactions with RIC-seq. *Nature Protocols* **16**, 2916-2946 (2021).
- 40 Van Damme, R. *et al.* Chemical reversible crosslinking enables measurement of RNA 3D distances and alternative conformations in cells. *Nature Communications* **13**, 911 (2022).
- 41 Wu, T. *et al.* KARR-seq reveals cellular higher-order RNA structures and RNA-RNA interactions. *Nat Biotechnol*(2024).
- 42 Aviran, S. *et al.* Modeling and automation of sequencing-based characterization of RNA structure. *Proc Natl Acad Sci U S A* **108**, 11069-11074 (2011).
- 43 Selega, A., Sirocchi, C., Iosub, I., Granneman, S. & Sanguinetti, G. Robust statistical modeling improves sensitivity of high-throughput RNA structure probing experiments. *Nat Methods* **14**, 83-89 (2017).
- 44 Choudhary, K., Lai, Y. H., Tran, E. J. & Aviran, S. dStruct: identifying differentially reactive regions from RNA structurome profiling data. *Genome Biol* **20**, 40 (2019).
- 45 Marangio, P., Law, K. Y. T., Sanguinetti, G. & Granneman, S. diffBUM-HMM: a robust statistical modeling approach for detecting RNA flexibility changes in high-throughput structure probing data. *Genome Biology* **22**, 165 (2021).
- 46 Yu, B., Li, P., Zhang, Q. C. & Hou, L. Differential analysis of RNA structure probing experiments at nucleotide resolution: uncovering regulatory functions of RNA structure. *Nature Communications* **13**, 4227 (2022).
- 47 Gong, J., Xu, K., Ma, Z., Lu, Z. J. & Zhang, Q. C. A deep learning method for recovering missing signals in transcriptome-wide RNA structure profiles from probing experiments. *Nature Machine Intelligence* **3**, 995-1006 (2021).
- 48 Homan, P. J. *et al.* Single-molecule correlated chemical probing of RNA. *Proc Natl Acad Sci U S A* **111**, 13858-13863 (2014).

- 49 Tomezsko, P. J. *et al.* Determination of RNA structural diversity and its role in HIV-1 RNA splicing. *Nature* **582**, 438-442 (2020).
- 50 Olson, S. W. *et al.* Discovery of a large-scale, cell-state-responsive allosteric switch in the 7SK RNA using DANCE-MaP. *Molecular Cell* **82**, 1708-1723.e1710 (2022).
- 51 Morandi, E. *et al.* Genome-scale deconvolution of RNA structure ensembles. *Nature Methods* **18**, 249-252 (2021).
- 52 Goodarzi, H. *et al.* Systematic discovery of structural elements governing stability of mammalian messenger RNAs. *Nature* **485**, 264-268 (2012).
- 53 Fish, L. *et al.* A prometastatic splicing program regulated by SNRPA1 interactions with structured RNA elements. *Science* **372**(2021).
- 54 Morandi, E., van Hemert, M. J. & Incarnato, D. SHAPE-guided RNA structure homology search and motif discovery. *Nature Communications* **13**, 1722 (2022).
- 55 Singh, J., Hanson, J., Paliwal, K. & Zhou, Y. RNA secondary structure prediction using an ensemble of two-dimensional deep neural networks and transfer learning. *Nat Commun* **10**, 5407 (2019).
- 56 Sato, K., Akiyama, M. & Sakakibara, Y. RNA secondary structure prediction using deep learning with thermodynamic integration. *Nat Commun* **12**, 941 (2021).
- 57 Fu, L. *et al.* Ufold: fast and accurate RNA secondary structure prediction with deep learning. *Nucleic Acids Res* **50**, e14 (2022).
- 58 Yang, E. *et al.* GCNfold: A novel lightweight model with valid extractors for RNA secondary structure prediction. *Comput Biol Med* **164**, 107246 (2023).
- 59 Townshend, R. J. L. *et al.* Geometric deep learning of RNA structure. *Science* **373**, 1047-1051 (2021).
- 60 Wang, W. *et al.* trRosettaRNA: automated prediction of RNA 3D structure with transformer network. *Nat Commun* **14**, 7266 (2023).
- 61 Li, Y. *et al.* Integrating end-to-end learning with deep geometrical potentials for ab initio RNA structure prediction. *Nat Commun* **14**, 5745 (2023).
- 62 Pan, X., Rijnbeek, P., Yan, J. & Shen, H.-B. Prediction of RNA-protein sequence and structure binding preferences using deep convolutional and recurrent neural networks. *BMC Genomics* **19**, 511 (2018).
- 63 Xu, Y. *et al.* PrismNet: predicting protein–RNA interaction using in vivo RNA structural information. *Nucleic Acids Research* **51**, W468-W477 (2023).
- 64 Baek, M. *et al.* Accurate prediction of protein-nucleic acid complexes using RoseTTAFoldNA. *Nat Methods* **21**, 117-121 (2024).
